# Supplementary material for: Synthesis and Evaluation of Fluorine-18-Labeled L-Rhamnose Derivatives
Source: MDPI journal article supplement (doi:10.3390/molecules28093773), 2023-04-27

## **Synthesis and Evaluation of Fluorine-18 labeled L-Rhamnose Derivatives**

Xiang Zhang<sup>1</sup>\*, Falguni Basuli<sup>1</sup>, Zhen-Dan Shi<sup>1</sup>, Swati Shah<sup>2</sup>, Jianfeng Shi<sup>1</sup>, Amelia Mitchell<sup>2</sup>, Jianhao Lai<sup>2</sup>, Zeping Wang<sup>2</sup>, Dima A. Hammoud<sup>2</sup>†, Rolf E. Swenson<sup>1</sup>†

<sup>1</sup> Chemistry and Synthesis Center, National Heart, Lung, and Blood Institute, National Institutes of Health, Rockville, MD, 20850, USA

<sup>2</sup> Center for Infectious Disease Imaging, Radiology and Imaging Sciences, Clinical Center, National Institutes of Health, Bethesda, MD, 20892, USA

\* Correspondence: [xiang.zhang2@nih.gov](mailto:xiang.zhang2@nih.gov)

† These authors contributed equally to this work.

**Figure S1.** Radio-TLC chromatogram of A) Compound **5**; B) Compound **6**; C) Compound **7** in whole human serum at 37 °C from 0–4 h. TLC developing solvent: 25% methanol in dichloromethane.

**A)**

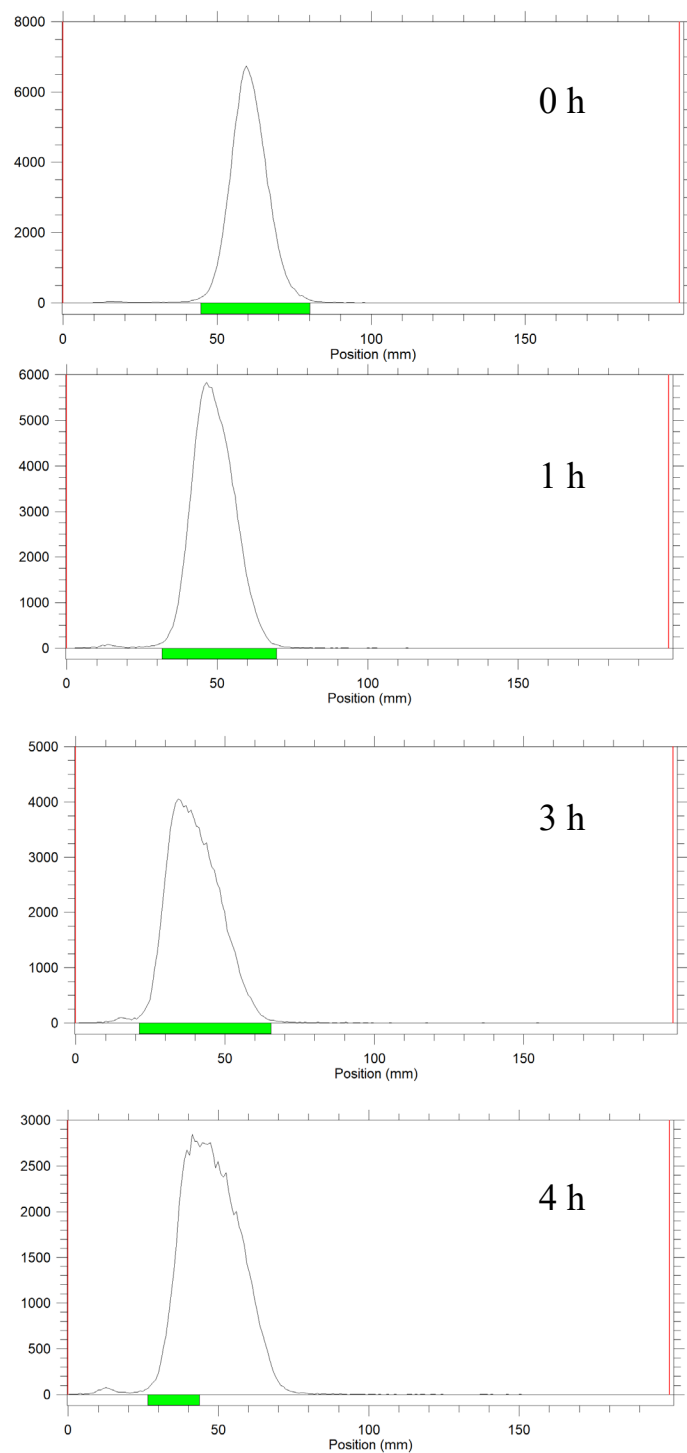

**B)**

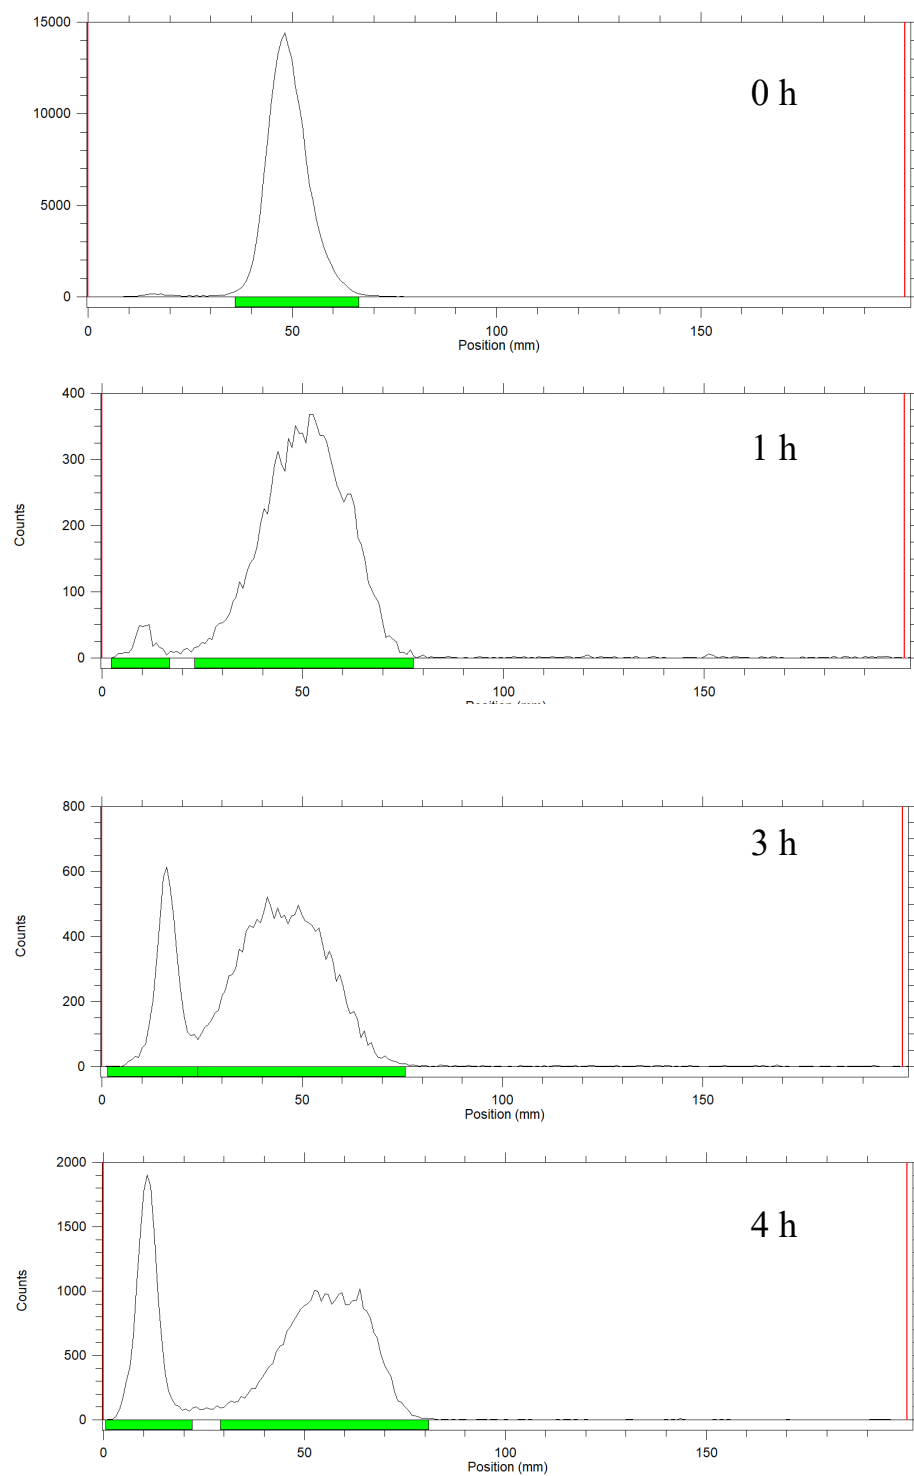

c)

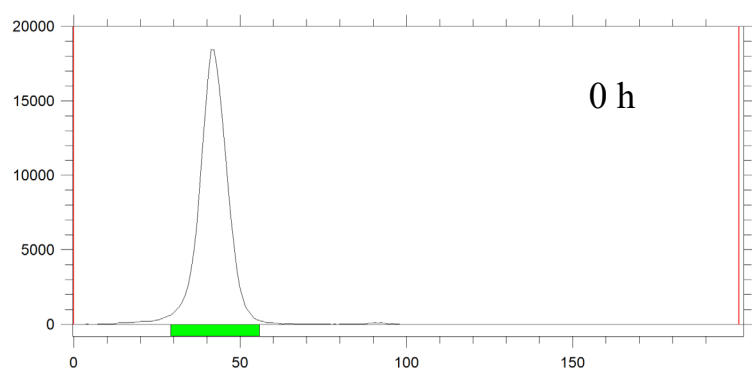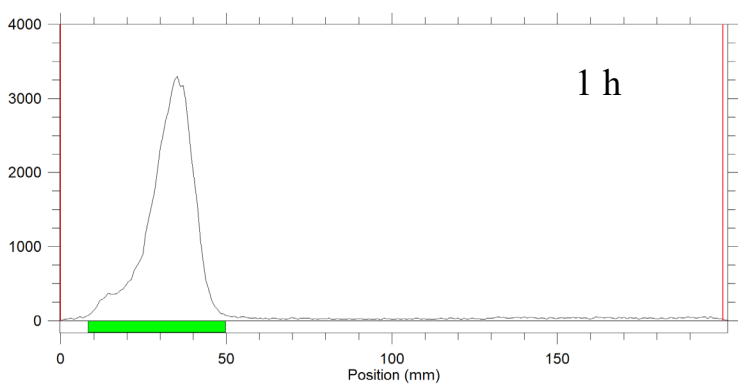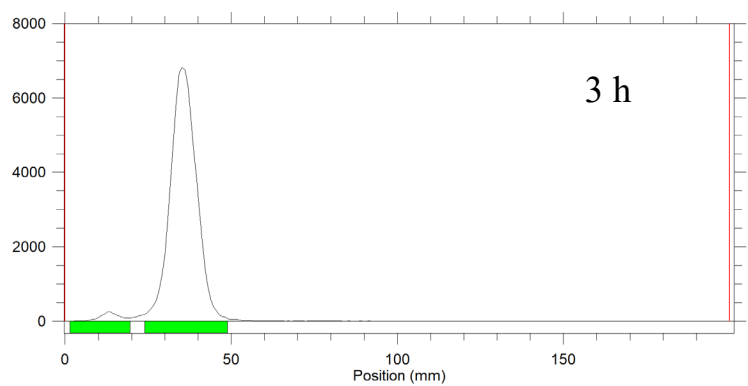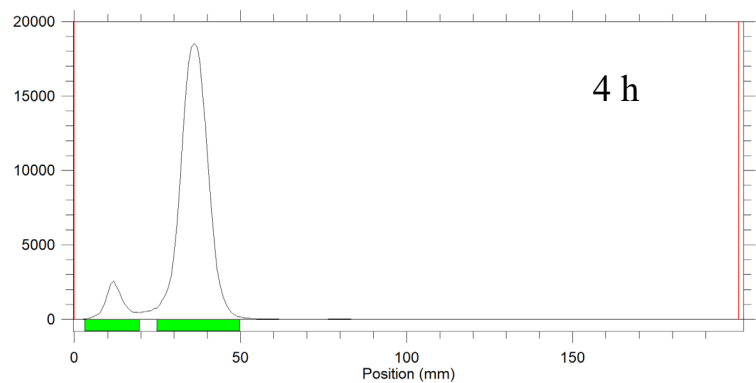

Supplement: s1 [file s1]
